# Supplementary material for: Network-level analysis of light adaptation in rod cells under normal and altered conditions
Source: Royal Society of Chemistry journal article supplement (doi:10.1039/b908123b), 2009-07-07
Supplement: b908123b.pdf [file b908123b.pdf]

## Molecular BioSystems Ref: B908123B

**Network-level analysis of light adaptation in rod cells under normal and altered conditions** by D. Dell'Orco, H. Schmidt, S. Mariani and F. Fanelli

### Electronic Supplementary Information

#### Contents:

- **Item 1:** Table S1 – reactions and kinetics in the phototransduction model, including comments
- **Item 2:** Table S2 – parameters appearing in the phototransduction model with values, descriptions and references
- **Item 3:** Table S3 – parameters that were necessarily tuned in the current model to be compatible with the new modules. Comparison with their values in the template model by Hamer *et al.*
- **Item 4:** Table S4 – velocities of some of the slowest reactions observed in the present model followed over a broad range of light intensities
- **Item 5:** Table S5 – time of recovery from photoresponses of wt and *Rpe65*<sup>-/-</sup> rods to flashes leading from 15% to 85% of rod saturation
- **References**

TABLE S1

| Reaction number | Reaction equation                                                                             | Reaction kinetics                                                              | Comments                                                                                                                                                            |
|-----------------|-----------------------------------------------------------------------------------------------|--------------------------------------------------------------------------------|---------------------------------------------------------------------------------------------------------------------------------------------------------------------|
| 1               | $R \xrightarrow{\text{stimulus}} R_0$                                                         | $v_f = \text{stimulus} \frac{R}{R_{\text{tot}}}$                               | Photoactivation of unphosphorylated R                                                                                                                               |
| 2               | $R_n + RK \xrightleftharpoons[kRK_2]{kRK1_n} R_n \cdot RK_{pre} \quad (n = 0, \dots, 6)$      | $v_f = kRK1_n \times R_n \times RK$<br>$v_r = kRK_2 \times R_n \cdot RK_{pre}$ | Binding of $R_n$ and RK. The association rate constant is assumed to decrease exponentially with increasing phosphorylations:<br>$kRK1_n = kRK1_0 \exp(-\omega n)$  |
| 3               | $R_n \cdot RK_{pre} \xrightarrow{kRK3_{ATP}} R_{n+1} \cdot RK_{post} \quad (n = 0, \dots, 5)$ | $v_f = kRK3_{ATP} \times R_n \cdot RK_{pre}$                                   | Phosphorylation of $R_n$ to give $R_{n+1}$                                                                                                                          |
| 4               | $R_n \cdot RK_{post} \xrightarrow{kRK4} R_n + RK \quad (n = 1, \dots, 6)$                     | $v_f = kRK4 \times R_n \cdot RK_{post}$                                        | Dissociation of the $R_n$ -RK complex                                                                                                                               |
| 5               | $R_n + Arr \xrightleftharpoons[kA2]{kA1_n} R_n \cdot Arr \quad (n = 1, \dots, 6)$             | $v_f = kA1_n \times R_n \times Arr$<br>$v_r = kA2 \times R_n \cdot Arr$        | Binding of $R_n$ and Arr. The association rate constant is assumed to increase exponentially with increasing phosphorylations:<br>$kA1_n = kArrexp(\omega_{arr} n)$ |
| 6               | $R_n \cdot Arr \xrightarrow{kA3} Ops + Arr \quad (n = 1, \dots, 6)$                           | $v_f = kA3 \times R_n \cdot Arr$                                               | Arr-mediated inactivation of $R_n$ . Ops indicates the inactivated receptor with unbound all-trans retinal                                                          |
| 7               | $R_n \xrightarrow{ktherm} Ops \quad (n = 0, \dots, 6)$                                        | $v_f = ktherm \times R_n$                                                      | Thermal decay of catalytic active form of $R_n$ to give Ops                                                                                                         |
| 8               | $Ops + Gt \xrightleftharpoons[kG2]{kOps} Ops \cdot Gt$                                        | $v_f = kOps \times Ops \times Gt$<br>$v_r = kG2 \times Ops \cdot Gt$           | Spontaneous Ops activity                                                                                                                                            |
| 9               | $Ops \cdot Gt \xrightleftharpoons[kG4_{GDP}]{kG3} Ops \cdot G$                                | $v_f = kG3 \times Ops \cdot Gt$<br>$v_r = kG4_{GDP} \times Ops \cdot G$        | GDP dissociation from the Ops-Gt complex                                                                                                                            |
| 10              | $Ops \cdot G \xrightarrow{kG5_{GTP}} Ops \cdot G_{GTP}$                                       | $v_f = kG5_{GTP} \times Ops \cdot G$                                           | GTP binding to the Ops-Gt complex                                                                                                                                   |
| 11              | $Ops \cdot G_{GTP} \xrightarrow{kG6} Ops + G_{GTP}$                                           | $v_f = kG6 \times Ops \cdot G_{GTP}$                                           | Dissociation of the Ops- $G_{GTP}$ complex                                                                                                                          |

|    |                                                                                                                                       |                                                                                                  |                                                                                                                                                                  |
|----|---------------------------------------------------------------------------------------------------------------------------------------|--------------------------------------------------------------------------------------------------|------------------------------------------------------------------------------------------------------------------------------------------------------------------|
| 12 | $Ops \xrightarrow{kRrecyc} R$                                                                                                         | $v_f = kRrecyc \times Ops$                                                                       | Chromophore regeneration by 11-cis retinal binding to Ops                                                                                                        |
| 13 | $R_n + Gt \xrightleftharpoons[kG2]{kG1_n} R_n \cdot Gt$ (n = 0, ..., 6)                                                               | $v_f = kG1_n \times R \times Gt$<br>$v_r = kG2 \times R_n \cdot Gt$                              | Binding of $R_n$ and Gt. The association rate constant is assumed to decrease exponentially with increasing phosphorylations:<br>$kG1_n = kG1_0 \exp(-\omega n)$ |
| 14 | $R_n \cdot Gt \xrightleftharpoons[kG4_{GDP}]{kG3} R_n \cdot G$ (n = 0, ..., 6)                                                        | $v_f = kG3 \times R_n \cdot Gt$<br>$v_r = kG4_{GDP} \times R_n \cdot G$                          | GDP dissociation from the $R_n \cdot Gt$ complex                                                                                                                 |
| 15 | $R_n \cdot G \xrightarrow{kG5_{GTP}} R_n \cdot G_{GTP}$ (n = 0, ..., 6)                                                               | $v_f = kG5_{GTP} \times R_n \cdot G$                                                             | GTP binding to the $R_n \cdot Gt$ complex                                                                                                                        |
| 16 | $R_n \cdot G_{GTP} \xrightarrow{kG6} R_n + G_{GTP}$ (n = 0, ..., 6)                                                                   | $v_f = kG6 \times R_n \cdot G_{GTP}$                                                             | Dissociation of the $R_n \cdot G_{GTP}$ complex                                                                                                                  |
| 17 | $G_{GTP} \xrightarrow{kG7} G\alpha_{GTP} + G\beta\gamma$                                                                              | $v_f = kG7 \times G_{GTP}$                                                                       | Dissociation of trimeric Gt into $\alpha$ and $\beta\gamma$ subunits                                                                                             |
| 18 | $PDE + G\alpha_{GTP} \xrightleftharpoons[kP1rev]{kP1} PDE \cdot G\alpha_{GTP}$                                                        | $v_f = kP1 \times PDE \times G\alpha_{GTP}$<br>( $v_r = kP1rev \times PDE \cdot G\alpha_{GTP}$ ) | Binding of $G\alpha_{GTP}$ to one PDE inactive subunit                                                                                                           |
| 19 | $PDE \cdot G\alpha_{GTP} \xrightarrow{kP2} PDE^* \cdot G\alpha_{GTP}$                                                                 | $v_f = kP2 \times PDE \cdot G\alpha_{GTP}$                                                       | Activation of the $PDE \cdot G\alpha_{GTP}$ complex                                                                                                              |
| 20 | $PDE^* \cdot G\alpha_{GTP} + G\alpha_{GTP} \xrightarrow{kP3} G\alpha_{GTP} \cdot PDE^* \cdot G\alpha_{GTP}$                           | $v_f = kP3 \times PDE^* \cdot G\alpha_{GTP} \times G\alpha_{GTP}$                                | Binding of $G\alpha_{GTP}$ to one PDE active subunit                                                                                                             |
| 21 | $G\alpha_{GTP} \cdot PDE^* \cdot G\alpha_{GTP} \xrightarrow{kP4} G\alpha_{GTP} \cdot ^*PDE^* \cdot G\alpha_{GTP}$                     | $v_f = kP4 \times G\alpha_{GTP} \cdot PDE^* \cdot G\alpha_{GTP}$                                 | Activation of both the $G\alpha_{GTP}$ -bound PDE subunits                                                                                                       |
| 22 | $RGS + G\alpha_{GTP} \cdot ^*PDE^* \cdot G\alpha_{GTP} \xrightarrow{kRGS1} RGS \cdot G\alpha_{GTP} \cdot ^*PDE^* \cdot G\alpha_{GTP}$ | $v_f = kRGS1 \times RGS \times G\alpha_{GTP} \cdot ^*PDE^* \cdot G\alpha_{GTP}$                  | Binding of RGS9 complex to the completely activated PDE tetramer                                                                                                 |
| 23 | $RGS \cdot G\alpha_{GTP} \cdot ^*PDE^* \cdot G\alpha_{GTP} \xrightarrow{kRGS2} PDE^* \cdot G\alpha_{GTP} + RGS + G\alpha_{GDP}$       | $v_f = kRGS2 \times RGS \cdot G\alpha_{GTP} \cdot ^*PDE^* \cdot G\alpha_{GTP}$                   | RGS9-mediated deactivation of one of the two PDE active subunits                                                                                                 |
| 24 | $RGS + PDE^* \cdot G\alpha_{GTP} \xrightarrow{kRGS1} RGS \cdot PDE^* \cdot G\alpha_{GTP}$                                             | $v_f = kRGS1 \times RGS \times PDE^* \cdot G\alpha_{GTP}$                                        | Binding of RGS9 complex to a PDE tetramer with one active subunit                                                                                                |

|    |                                                                                                                        |                                                                                                                                   |                                                                                                             |
|----|------------------------------------------------------------------------------------------------------------------------|-----------------------------------------------------------------------------------------------------------------------------------|-------------------------------------------------------------------------------------------------------------|
| 25 | $RGS \cdot PDE^* \cdot G\alpha_{GTP} \xrightarrow{kRGS2} PDE + RGS + G\alpha_{GDP}$                                    | $v_f = kRGS2 \times RGS \cdot PDE^* \cdot G\alpha_{GTP}$                                                                          | RGS9-mediated deactivation of the PDE only active subunit                                                   |
| 26 | $PDE^* \cdot G\alpha_{GTP} \xrightarrow{kPDE_{shutoff}} PDE + G\alpha_{GDP}$                                           | $v_f = kPDE_{shutoff} \times PDE^* \cdot G\alpha_{GTP}$                                                                           | Inactivation of the PDE*·Gα <sub>GTP</sub> complex by Gα <sub>GTP</sub> 's GTPase activity                  |
| 27 | $G\alpha_{GTP} \cdot PDE^* \cdot G\alpha_{GTP} \xrightarrow{kPDE_{shutoff}} PDE^* \cdot G\alpha_{GTP} + G\alpha_{GDP}$ | $v_f = kPDE_{shutoff} \times G\alpha_{GTP} \cdot PDE^* \cdot G\alpha_{GTP}$                                                       | Inactivation of one of the two active PDE subunits by Gα <sub>GTP</sub> 's GTPase activity                  |
| 28 | $G\alpha_{GTP} \xrightarrow{kGshutoff} G\alpha_{GDP}$                                                                  | $v_f = kGshutoff \times G\alpha_{GTP}$                                                                                            | Gα <sub>GTP</sub> auto-catalytic GTPase activity                                                            |
| 29 | $G\alpha_{GDP} + G\beta\gamma \xrightarrow{kGrecyc} Gt$                                                                | $v_f = kGrecyc \times G\alpha_{GDP} \times G\beta\gamma$                                                                          | Reconstitution of Gt heterotrimer from its inactive subunits                                                |
| 30 | $RK \xrightleftharpoons[kRec4]{kRec3} Rec \cdot wCa^{2+} \cdot RK$                                                     | $v_f = kRec3 \times Rec \cdot wCa^{2+} \times RK$<br>$v_r = kRec4 \times Rec \cdot wCa^{2+} \cdot RK$                             | Rec-mediated regulation of RK. Rec·wCa <sup>2+</sup> is determined under quasi-steady state assumption      |
| 31 | $Ca_{free}^{2+} \xrightleftharpoons[k2]{k1} Ca_{buff}^{2+}$                                                            | $v_f = k1 \times (eT - Ca_{buff}^{2+}) \times Ca_{free}^{2+}$<br>$v_r = k2 \times Ca_{buff}^{2+}$                                 | Ca <sup>2+</sup> association and dissociation from intracellular buffers with total concentration eT        |
| 32 | $Ca_{free}^{2+} \xrightarrow{\gamma Ca}$                                                                               | $v_f = \gamma Ca \times (Ca_{free}^{2+} - Ca_0^{2+})$                                                                             | Intracellular Ca <sup>2+</sup> -efflux via the Na <sup>+</sup> /Ca <sup>2+</sup> - K <sup>+</sup> exchanger |
| 33 | $\longrightarrow Ca_{free}^{2+}$                                                                                       | $v_f = \frac{10^6 fCa \times J_{dark}}{2 + fCa \times F \times v_{cyto}} \times \left( \frac{cGMP}{cGMP_{dark}} \right)^{n_{cg}}$ | Extracellular Ca <sup>2+</sup> -influx via the cGMP-gated cation channels                                   |
| 34 | $\longrightarrow cGMP$                                                                                                 | $v_f = \frac{a_{max}}{1 + \left( \frac{Ca_{free}^{2+}}{Kc} \right)^m}$                                                            | cGMP synthesis by guanylate cyclase                                                                         |
| 35 | $cGMP \longrightarrow$                                                                                                 | $v_f = (\beta_{dark} + \beta_{sub} \times E) \times cGMP$                                                                         | cGMP hydrolysis by PDE                                                                                      |

**TABLE S2**

| Parameter          | Value      | Reaction | Description                                                  | Comments                       | References                                              |
|--------------------|------------|----------|--------------------------------------------------------------|--------------------------------|---------------------------------------------------------|
| flashBG            | 0          | 1        | # photons in the background flash                            | See the definition of stimulus | (Hamer <i>et al</i> , 2005)                             |
| flash0Dur          | 0.001 s    | 1        | Duration of the pre-flash                                    | See the definition of stimulus | (Hamer <i>et al</i> , 2005)                             |
| flash0Mag          | 1          | 1        | # photons in the pre-flash                                   | See the definition of stimulus | (Hamer <i>et al</i> , 2005)                             |
| flashDelay         | 0 s        | 1        | time-delay between the pre-flash and the flash               | See the definition of stimulus | (Hamer <i>et al</i> , 2005)                             |
| flashDur           | 0.001 s    | 1        | Duration of the flash                                        | See the definition of stimulus | (Hamer <i>et al</i> , 2005)                             |
| flashMag           | 0          | 1        | Amount of photons in the flash                               | See the definition of stimulus | (Hamer <i>et al</i> , 2005)                             |
| otherstimulus      | 0          | 1        | Additional stimulus to be able to by-pass the flash settings | See the definition of stimulus | -                                                       |
| R <sub>tot</sub>   | 3.6e9      | 1        | Total amount of R                                            |                                | (Pugh and Lamb, 2000)                                   |
| PDE <sub>tot</sub> | 1.335e7    | 18,20    | Total amount of PDE6 tetramers                               |                                | (Pugh <i>et al</i> , 2000)                              |
| G <sub>tot</sub>   | 3.6e8      | 13       | Total amount of Gt                                           |                                | (Pugh <i>et al</i> , 2000)                              |
| Arr <sub>tot</sub> | 3.13e7     | 5        | Total amount of Arr                                          |                                | (Hamer <i>et al</i> , 2005; Hamm and Bownds, 1986)      |
| Rec <sub>tot</sub> | 35 $\mu$ M | 30       | Total concentration of Rec                                   |                                | (Ames <i>et al</i> , 1997; Kawamura and Murakami, 1991) |

|                    |                           |       |                                                                                                                    |                                                                                |                                |
|--------------------|---------------------------|-------|--------------------------------------------------------------------------------------------------------------------|--------------------------------------------------------------------------------|--------------------------------|
| RK <sub>tot</sub>  | 7 $\mu$ M                 | -     | Total concentration of RK                                                                                          | Only used for quasi- steady state assumption (QSSA)                            | (Klenchin <i>et al</i> , 1995) |
| RGS <sub>tot</sub> | 3e6                       | 22,24 | Total amount of RGS9                                                                                               | Value estimated from data in (Pugh <i>et al</i> , 2000)                        | -                              |
| kRK1_0             | 7.643e-3 s <sup>-1</sup>  | 2     | Rate of binding of RK to unphosphorylated R in the dark                                                            | Optimized by parameter estimation                                              | -                              |
| $\omega$           | 0.6                       | 2,13  | Exponential rate of decay of Gt and RK affinity for R <sub>n</sub> as a function of the number of phosphorylations | Value obtained from fitting to experimental data. See the reference fo details | (Gibson <i>et al</i> , 2000)   |
| kRK2               | 250 s <sup>-1</sup>       | 2     | Rate constant of dissociation of R <sub>n</sub> from R <sub>n</sub> ·RK prior to phosphorylation                   |                                                                                | (Hamer <i>et al</i> , 2005)    |
| RK <sub>dark</sub> | 10838                     | 2     | Amount of unbound RK in the dark state                                                                             | Obtained from initial equilibrium between RK and Rec (QSSA)                    | -                              |
| kRK3[ATP]          | 400 s <sup>-1</sup>       | 3     | Rate of binding ATP to R <sub>n</sub> ·RK                                                                          | Value already multiplied for [ATP]                                             | (Hamer <i>et al</i> , 2005)    |
| kRK4               | 20 s <sup>-1</sup>        | 4     | Rate constant of dissociation of R <sub>n</sub> from R <sub>n</sub> ·RK following phosphorylation                  |                                                                                | (Hamer <i>et al</i> , 2005)    |
| $\omega_{arr}$     | 0.8132                    | 5     | Exponential rate of increase of Arr affinity for R <sub>n</sub> as a function of the number of phosphorylations    | Optimized by parameter estimation                                              | -                              |
| kArr               | 6.092e-10 s <sup>-1</sup> | 5     | Basis of the exponential rate of increase of Arr affinity for R <sub>n</sub>                                       | Optimized by parameter estimation                                              | -                              |
| KA2                | 3.232e-3 s <sup>-1</sup>  | 5     | Rate constant of dissociation of R <sub>n</sub> from Arr·R <sub>n</sub> , without R <sub>n</sub> inactivation      | Optimized by parameter estimation                                              | -                              |

|          |                                   |       |                                                                                                                       |                                              |                                                      |
|----------|-----------------------------------|-------|-----------------------------------------------------------------------------------------------------------------------|----------------------------------------------|------------------------------------------------------|
| KA3      | $4.4509\text{e-}2 \text{ s}^{-1}$ | 6     | Rate constant of dissociation and inactivation of $R_n$ from $R_n \cdot \text{Arr}$ to give Ops                       | Optimized by parameter estimation            | -                                                    |
| kOps     | $6.117\text{e-}13 \text{ s}^{-1}$ | 8     | Rate constant of association of Ops and Gt due to basal activity                                                      | Estimated according to experimental evidence | (Cornwall and Fain, 1994; Melia <i>et al</i> , 1997) |
| kRrecyc  | $7\text{e-}4 \text{ s}^{-1}$      | 12    | Rate constant of association of Ops and 11-cis ret to reconstitute inactive R                                         | Value already multiplied by [11-cis retinal] | (Firsov <i>et al</i> , 2005)                         |
| kG1_0    | $3.059\text{e-}5 \text{ s}^{-1}$  | 13    | Rate of binding G-GDP to unphosphorylated $R_0$ in the dark                                                           | Optimized by parameter estimation            | -                                                    |
| kG2      | $2250.34 \text{ s}^{-1}$          | 8,13  | Rate constant of dissociation of $R_n$ from $R_n \cdot \text{Gt}$                                                     | Optimized by parameter estimation            | -                                                    |
| kG3      | $2000 \text{ s}^{-1}$             | 9,14  | Rate constant of dissociation of GDP from $R_n \cdot \text{Gt}$                                                       |                                              | (Hamer <i>et al</i> , 2005)                          |
| kG4[GDP] | $600 \text{ s}^{-1}$              | 9,14  | Rate of binding GDP to $R_n \cdot \text{Gt}$                                                                          |                                              | (Hamer <i>et al</i> , 2005)                          |
| kG5[GTP] | $750 \text{ s}^{-1}$              | 10,15 | Rate of binding GTP to $R_n \cdot \text{G}$                                                                           |                                              | (Hamer <i>et al</i> , 2005)                          |
| kG6      | $2000 \text{ s}^{-1}$             | 11,16 | Rate constant of dissociation of $R_n$ from $R_n \cdot \text{G}_{\text{GTP}}$                                         |                                              | (Hamer <i>et al</i> , 2005)                          |
| kG7      | $200 \text{ s}^{-1}$              | 17    | Rate constant of dissociation of $\text{G}_{\text{GTP}}$ into $\text{G}\alpha_{\text{GTP}}$ and $\text{G}\beta\gamma$ |                                              | (Hamer <i>et al</i> , 2005)                          |
| kGrecyc  | $2 \text{ s}^{-1}$                | 29    | Rate constant of Gt reconstitution from $\text{G}\alpha_{\text{GTP}}$ and $\text{G}\beta\gamma$ subunits              |                                              | (Felber <i>et al</i> , 1996)                         |

|                         |                                        |       |                                                                                                           |                                                      |                              |
|-------------------------|----------------------------------------|-------|-----------------------------------------------------------------------------------------------------------|------------------------------------------------------|------------------------------|
| kGshutoff               | $0.05 \text{ s}^{-1}$                  | 28    | Rate of spontaneous self-catalyzed hydrolysis of GTP to GDP by $G_{\alpha}$                               |                                                      | (Felber <i>et al</i> , 1996) |
| kP1                     | $5.5\text{e-}2 \text{ s}^{-1}$         | 18    | Rate of binding PDE to $G_{\alpha}$ ·GTP                                                                  | Optimized by parameter estimation                    | -                            |
| kP1 <sub>rev</sub>      | $0 \text{ s}^{-1}$                     | 18    | Rate constant of dissociation of PDE· $G_{\alpha}$ ·GTP                                                   | Set equal to zero in this model                      | -                            |
| kP2                     | $940.7 \text{ s}^{-1}$                 | 19    | Rate constant of removal of inhibition from the $\gamma$ subunit of PDE*· $G_{\alpha\text{GTP}}$          | Optimized by parameter estimation                    | -                            |
| kP3                     | $1.498\text{e-}9 \text{ s}^{-1}$       | 20    | Rate of binding $G_{\alpha\text{GTP}}$ to an active PDE*· $G_{\alpha\text{GTP}}$ complex                  | Optimized by parameter estimation                    | -                            |
| kP4                     | $21.09 \text{ s}^{-1}$                 | 21    | Rate constant of activation of the second subunit in $G_{\alpha\text{GTP}}$ ·PDE*· $G_{\alpha\text{GTP}}$ | Optimized by parameter estimation                    | -                            |
| kPDE <sub>shutoff</sub> | $0.033 \text{ s}^{-1}$                 | 26,27 | Rate constant of PDE-induced shutoff of PDE*· $G_{\alpha\text{GTP}}$                                      | Manually tuned                                       | -                            |
| kRGS1                   | $1.57\text{e-}7 \text{ s}^{-1}$        | 22,24 | Rate of binding RGS to a PDE· $G_{\alpha}$ ·GTP complex with either active subunits                       | Manually tuned and optimized by parameter estimation | -                            |
| kRGS2                   | $256.07 \text{ s}^{-1}$                | 23,25 | Rate constant of dissociation of one PDE*· $G_{\alpha}$ ·GTP and GTP hydrolysis                           | Optimized by parameter estimation                    | -                            |
| kRec3                   | $9.6878 \mu\text{M}^{-1}\text{s}^{-1}$ | 30    | Rate constant of binding RK to Rec·wCa <sup>2+</sup>                                                      | Optimized by parameter estimation                    | -                            |
| kRec4                   | $0.610084 \text{ s}^{-1}$              | 30    | Rate constant of dissociation of RK from RK·Rec·wCa <sup>2+</sup>                                         | Optimized by parameter estimation                    | -                            |



|                       |                           |    |                                                                                       |                                                                   |                                                                                 |
|-----------------------|---------------------------|----|---------------------------------------------------------------------------------------|-------------------------------------------------------------------|---------------------------------------------------------------------------------|
| Kp                    | 0.425272 $\mu\text{M}$    | 30 | [Ca <sup>2+</sup> ] causing half maximal inhibition of Rec                            | Involved in Rec equilibrium.<br>Optimized by parameter estimation | -                                                                               |
| w                     | 2                         | 30 | Hill coefficient for the action of Ca <sup>2+</sup> on Rec                            | Involved in Rec equilibrium                                       | (Klenchin <i>et al</i> , 1995)<br>(Chen <i>et al</i> , 1995)                    |
| V <sub>cyto</sub>     | 1 pL                      | 33 | Cytoplasmic rod volume                                                                |                                                                   | (Pugh <i>et al</i> , 2000)                                                      |
| Kc                    | 0.17 $\mu\text{M}$        | 34 | [Ca <sup>2+</sup> ] at which synthesis of cGMP is half of $\alpha_{\text{max}}$       | Involved in the expression defining $\alpha_{\text{max}}$         | (Hamer, 2000)                                                                   |
| m                     | 2.5                       | 34 | Hill coefficient for the action of Ca <sup>2+</sup> on cyclase rate                   | Involved in the expression defining $\alpha_{\text{max}}$         | (Gorczyca <i>et al</i> , 1994)                                                  |
| $\beta_{\text{dark}}$ | 1.2 s <sup>-1</sup>       | 35 | Dark rate of cGMP hydrolysis                                                          | Involved in the expression defining $\alpha_{\text{max}}$         | (Hamer, 2000)                                                                   |
| $\beta_{\text{sub}}$  | 4.3e-4 s <sup>-1</sup>    | 35 | Rate constant for a catalytic PDE subunit in a well-stirred volume, V <sub>cyto</sub> |                                                                   | (Leskov <i>et al</i> , 2000)                                                    |
| fCa                   | 0.2                       | 33 | Fraction of circulating current carried by Ca <sup>2+</sup>                           | Involved in the expression defining J                             | (Ohyama <i>et al</i> , 2000)                                                    |
| J <sub>dark</sub>     | 29.7778 pA                | 33 | Dark circulating current                                                              | Involved in the expression defining J                             | (Hamer <i>et al</i> , 2005)                                                     |
| F                     | 96485.34 cm <sup>-1</sup> | 33 | Faraday constant                                                                      |                                                                   |                                                                                 |
| cGMP <sub>dark</sub>  | 4 $\mu\text{M}$           | 33 | [cGMP] in the dark                                                                    | Involved in the expression defining $\alpha_{\text{max}}$ and J   | (Nikonov <i>et al</i> , 2000;<br>Pugh and Lamb, 1990; Pugh <i>et al</i> , 2000) |
| n <sub>cg</sub>       | 3                         | 33 | Hill coefficient for opening the cGMP-gated channels                                  | Involved in the expression defining J                             | (Hamer, 2000)                                                                   |

|                     |                                         |    |                                                                                                            |                                                          |                                                                                             |
|---------------------|-----------------------------------------|----|------------------------------------------------------------------------------------------------------------|----------------------------------------------------------|---------------------------------------------------------------------------------------------|
| $\gamma_{Ca}$       | 47.554 s <sup>-1</sup>                  | 32 | Rate constant of Ca <sup>2+</sup> extrusion by Na <sup>+</sup> /Ca <sup>2+</sup> -K <sup>+</sup> exchanger |                                                          | (Hamer <i>et al</i> , 2005)                                                                 |
| Ca <sub>2dark</sub> | 0.6 μM                                  | -  | [Ca <sup>2+</sup> ] in the dark                                                                            | Involved in the expression defining $\alpha_{max}$ and J | (Hamer <i>et al</i> , 2005)                                                                 |
| Ca <sub>20</sub>    | 0.01 μM                                 | 32 | Minimum intracellular [Ca <sup>2+</sup> ]                                                                  | Involved in the expression defining J                    | (Gray-Keller and Detwiler, 1994; McCarthy <i>et al</i> , 1994; Sampath <i>et al</i> , 1998) |
| k1                  | 0.3815 μM <sup>-1</sup> s <sup>-1</sup> | 31 | Rate constant of Ca <sup>2+</sup> binding to buffers                                                       | Optimized by parameter estimation                        | -                                                                                           |
| k2                  | 1.909 s <sup>-1</sup>                   | 31 | Rate constant of Ca <sup>2+</sup> dissociation from buffers                                                | Optimized by parameter estimation                        | -                                                                                           |
| eT                  | 400 μM                                  | 31 | Total concentration of Ca <sup>2+</sup> buffers                                                            |                                                          | (Forti <i>et al</i> , 1989; Hamer <i>et al</i> , 2005)                                      |
| k <sub>therm</sub>  | 0.0238 s <sup>-1</sup>                  | 7  | Rate constant of thermal decay of active R <sub>n</sub>                                                    |                                                          | (Xu <i>et al</i> , 1997)                                                                    |

**TABLE S3**

| Parameter                   | kRK1_0 | kA2    | kA3   | kG1_0    | kG2  | kRec3 | kRec4 | Kp   | k1   | k2   |
|-----------------------------|--------|--------|-------|----------|------|-------|-------|------|------|------|
| (Hamer <i>et al</i> , 2005) | 0.0092 | 0.0023 | 0.035 | 0.000028 | 2000 | 10.00 | 0.50  | 0.40 | 0.50 | 2.50 |
| Current model               | 0.0076 | 0.0032 | 0.045 | 0.000031 | 2250 | 9.69  | 0.61  | 0.43 | 0.38 | 1.91 |

**Note to Table S3:** In this table the ten parameters whose values were changed with respect to those in the template model (Hamer *et al*, 2005) are shown. They all are within a factor of 2 with respect to previous ones. The remaining 44 parameters in the template model were kept fixed.

**TABLE S4**

| # of photoactivated rhodopsins | Second PDE subunit activation |               | RGS-mediated shutoff of one PDE subunit in the completely activated tetramer |               | PDE shutoff by G $\alpha$ GTP GTPase activity |               | G $\alpha$ GTP auto-catalytic GTPase activity | Reconstitution of Gt heterotrimer |
|--------------------------------|-------------------------------|---------------|------------------------------------------------------------------------------|---------------|-----------------------------------------------|---------------|-----------------------------------------------|-----------------------------------|
|                                | reaction # 20                 | reaction # 21 | reaction # 22                                                                | reaction # 23 | reaction # 26                                 | reaction # 27 | reaction # 28                                 | reaction # 29                     |
| 10                             | 5.00E-09                      | 5.00E-09      | 1.80E-09                                                                     | 1.80E-09      | 55                                            | 1.30E-10      | 2.00E-04                                      | 8.50E+02                          |
| 50                             | 1.10E-07                      | 1.10E-07      | 4.00E-08                                                                     | 4.00E-08      | 260                                           | 2.80E-09      | 1.00E-03                                      | 4.00E+03                          |
| 100                            | 4.50E-07                      | 4.50E-07      | 1.50E-07                                                                     | 1.50E-07      | 500                                           | 1.20E-08      | 2.00E-03                                      | 7.50E+03                          |
| 500                            | 9.00E-06                      | 9.00E-06      | 3.00E-06                                                                     | 3.00E-06      | 2300                                          | 2.10E-07      | 1.00E-02                                      | 3.50E+04                          |
| 1000                           | 3.50E-05                      | 3.50E-05      | 1.20E-05                                                                     | 1.20E-05      | 4500                                          | 8.00E-07      | 2.00E-02                                      | 7.00E+04                          |
| 2000                           | 1.40E-04                      | 1.40E-04      | 4.50E-05                                                                     | 4.50E-05      | 9.00E+03                                      | 3.20E-06      | 4.00E-02                                      | 1.40E+05                          |
| 5000                           | 9.00E-04                      | 9.00E-04      | 2.90E-04                                                                     | 2.90E-04      | 2.20E+04                                      | 2.00E-05      | 1.00E-01                                      | 3.30E+05                          |
| 10000                          | 3.60E-03                      | 3.60E-03      | 1.20E-03                                                                     | 1.20E-03      | 4.40E+04                                      | 8.44E-05      | 2.00E-01                                      | 6.70E+05                          |
| 20000                          | 1.60E-02                      | 1.60E-02      | 5.00E-03                                                                     | 5.00E-03      | 9.00E+04                                      | 3.60E-04      | 4.00E-01                                      | 1.30E+06                          |
| 50000                          | 1.40E-01                      | 1.40E-01      | 4.50E-02                                                                     | 4.50E-02      | 2.10E+05                                      | 3.50E-03      | 1.04E+00                                      | 3.30E+06                          |
| 100000                         | 1.00E+01                      | 1.00E+01      | 1.90E+00                                                                     | 1.90E+00      | 4.30E+05                                      | 1.30E-01      | 2.60E+01                                      | 6.50E+06                          |
| 101000                         | 2.36E+01                      | 2.20E+01      | 3.20E+00                                                                     | 3.20E+00      | 4.36E+05                                      | 2.30E-01      | 6.00E+01                                      | 6.60E+06                          |
| 102000                         | 6.76E+02                      | 5.44E+02      | 3.68E+01                                                                     | 3.68E+01      | 4.40E+05                                      | 2.60E+00      | 1.69E+03                                      | 6.66E+06                          |
| 105000                         | 8.89E+03                      | 8.89E+03      | 1.33E+03                                                                     | 1.33E+03      | 4.39E+05                                      | 9.40E+01      | 2.25E+04                                      | 6.70E+06                          |
| 110000                         | 2.37E+04                      | 2.37E+04      | 5.33E+03                                                                     | 5.33E+03      | 4.40E+05                                      | 3.76E+02      | 6.00E+04                                      | 6.72E+06                          |
| 118000                         | 4.80E+04                      | 4.80E+04      | 1.44E+04                                                                     | 1.44E+04      | 4.40E+05                                      | 1.02E+03      | 1.22E+05                                      | 6.80E+06                          |
| 120000                         | 5.50E+04                      | 5.50E+04      | 1.70E+04                                                                     | 1.70E+04      | 4.40E+05                                      | 1.20E+03      | 1.40E+05                                      | 6.80E+06                          |

**Note to Table S4:** The velocities of some of the slowest reactions observed in our dynamic model are reported (see Table S1 for the definition of each reaction). The reactions were followed over a broad range of light intensities (10 up to 120,000 photoactivations) and were all found to increase their velocity for increased bleaching.

**TABLE S5**

| % rod saturation | WT rod                      |                   | Rpe65 knockout rod             |               | $\Delta$ recovery time (s) |
|------------------|-----------------------------|-------------------|--------------------------------|---------------|----------------------------|
|                  | # photoactivated Rhodopsins | recovery time (s) | # photoactivated isoRhodopsins | recovery time |                            |
| 15%              | 4.5                         | 7.7               | 305                            | 6.4           | 1.3                        |
| 35%              | 14                          | 10.2              | 850                            | 7.9           | 2.3                        |
| 50%              | 25.75                       | 11.8              | 1400                           | 8.8           | 3                          |
| 70%              | 56                          | 15.4              | 2675                           | 10.1          | 5.3                        |
| 85%              | 116                         | 16.7              | 5100                           | 12            | 4.7                        |

**Note to Table S5:** After simulating the wt and *Rpe65*<sup>-/-</sup> rod photoresponses to flashes leading from 15% to 85% of rod saturation, we measured the corresponding time of recovery, that is the time needed for the photocurrent to get back to the initial value before illumination. The measured values are displayed in this table, together with the intensities (expressed as the number of photoactivated pigments) needed to reach the same level of saturation in rod photocurrent. In the rightmost column the difference between times of recovery of *Rpe65*<sup>-/-</sup> and wt rod is shown.

## REFERENCES

- Ames JB, Ishima R, Tanaka T, Gordon JI, Stryer L, Ikura M (1997) Molecular mechanics of calcium-myristoyl switches. *Nature* 389: 198-202.
- Chen CK, Inglese J, Lefkowitz RJ, Hurley JB (1995) Ca<sup>2+</sup>-dependent interaction of recoverin with rhodopsin kinase. *J Biol Chem* 270: 18060-18066.
- Cornwall MC, Fain GL (1994) Bleached pigment activates transduction in isolated rods of the salamander retina. *J Physiol* 480 ( Pt 2): 261-279.
- Felber S, Breuer HP, Petruccione F, Honerkamp J, Hofmann KP (1996) Stochastic simulation of the transducin GTPase cycle. *Biophys J* 71: 3051-3063.
- Firsov ML, Kolesnikov AV, Golobokova EY, Govardovskii VI (2005) Two realms of dark adaptation. *Vision Res* 45: 147-151.
- Forti S, Menini A, Rispoli G, Torre V (1989) Kinetics of phototransduction in retinal rods of the newt *Triturus cristatus*. *J Physiol* 419: 265-295.
- Gibson SK, Parkes JH, Liebman PA (2000) Phosphorylation modulates the affinity of light-activated rhodopsin for G protein and arrestin. *Biochemistry* 39: 5738-5749.
- Gorczyca WA, Gray-Keller MP, Detwiler PB, Palczewski K (1994) Purification and physiological evaluation of a guanylate cyclase activating protein from retinal rods. *Proc Natl Acad Sci U S A* 91: 4014-4018.
- Gray-Keller MP, Detwiler PB (1994) The calcium feedback signal in the phototransduction cascade of vertebrate rods. *Neuron* 13: 849-861.
- Hamer RD (2000) Analysis of Ca<sup>++</sup>-dependent gain changes in PDE activation in vertebrate rod phototransduction. *Mol Vis* 6: 265-286.
- Hamer RD, Nicholas SC, Tranchina D, Lamb TD, Jarvinen JL (2005) Toward a unified model of vertebrate rod phototransduction. *Vis Neurosci* 22: 417-436.
- Hamm HE, Bownds MD (1986) Protein complement of rod outer segments of frog retina. *Biochemistry* 25: 4512-4523.
- Kawamura S, Murakami M (1991) Calcium-dependent regulation of cyclic GMP phosphodiesterase by a protein from frog retinal rods. *Nature* 349: 420-423.
- Klenchin VA, Calvert PD, Bownds MD (1995) Inhibition of rhodopsin kinase by recoverin. Further evidence for a negative feedback system in phototransduction. *J Biol Chem* 270: 16147-16152.
- Leskov IB, Klenchin VA, Handy JW, Whitlock GG, Govardovskii VI, Bownds MD, Lamb TD, Pugh EN, Jr., Arshavsky VY (2000) The gain of rod phototransduction: reconciliation of biochemical and electrophysiological measurements. *Neuron* 27: 525-537.
- McCarthy ST, Younger JP, Owen WG (1994) Free calcium concentrations in bullfrog rods determined in the presence of multiple forms of Fura-2. *Biophys J* 67: 2076-2089.

Melia TJ, Jr., Cowan CW, Angleson JK, Wensel TG (1997) A comparison of the efficiency of G protein activation by ligand-free and light-activated forms of rhodopsin. *Biophys J* 73: 3182-3191.

Nikonov S, Lamb TD, Pugh EN, Jr. (2000) The role of steady phosphodiesterase activity in the kinetics and sensitivity of the light-adapted salamander rod photoresponse. *J Gen Physiol* 116: 795-824.

Ohyama T, Hackos DH, Frings S, Hagen V, Kaupp UB, Korenbrot JI (2000) Fraction of the dark current carried by Ca(2+) through cGMP-gated ion channels of intact rod and cone photoreceptors. *J Gen Physiol* 116: 735-754.

Pugh EN, Jr., Lamb TD (1990) Cyclic GMP and calcium: the internal messengers of excitation and adaptation in vertebrate photoreceptors. *Vision Res* 30: 1923-1948.

Pugh EN, Jr., Lamb TD (2000) *Phototransduction in Vertebrate Rods and Cones: Molecular Mechanisms of Amplification, Recovery and Light Adaptation*, Vol. 3: Elsevier Science B.V. .

Sampath AP, Matthews HR, Cornwall MC, Fain GL (1998) Bleached pigment produces a maintained decrease in outer segment Ca<sup>2+</sup> in salamander rods. *J Gen Physiol* 111: 53-64.

Xu J, Dodd RL, Makino CL, Simon MI, Baylor DA, Chen J (1997) Prolonged photoresponses in transgenic mouse rods lacking arrestin. *Nature* 389: 505-509.
